# Supplementary material for: Reactive Sulfur Species Omics Analysis in the Brain Tissue of the 5xFAD Mouse Model of Alzheimer’s Disease
Source: MDPI journal article supplement (doi:10.3390/antiox12051105), 2023-05-16
Supplement: s1 [file s1]

## **Reactive sulfur species omics analysis in the brain tissue of the 5xFAD mouse model of Alzheimer's disease**

**Ayaka Kinno<sup>1</sup>, Shingo Kasamatsu<sup>1</sup>, Takaaki Akaike<sup>2</sup>, Hideshi Ihara<sup>1, \*</sup>**

<sup>1</sup>Department of Biological Chemistry Graduate School of Science, Osaka Metropolitan University, Sakai 599-8531, Osaka, Japan.

<sup>2</sup>Department of Environmental Medicine and Molecular Toxicology, Tohoku University Graduate School of Medicine, Sendai 980-8575, Miyagi, Japan.

\*Corresponding author: Hideshi Ihara, Department of Biological Chemistry, Graduate School of Science, Osaka Metropolitan University, 1-1 Gakuen-cho, Sakai 599-8531, Osaka, Japan. Tel.: +81-72-254-9753; E-mail: [iharah@omu.ac.jp](mailto:iharah@omu.ac.jp)

**Supplementary Table S1.** Multiple reaction monitoring (MRM) parameters of *N*-ethylmaleimide (NEM)/*N*-iodoacetyl L-tyrosine methyl ester (TME-IAM)-adducts used for liquid chromatography-electrospray ionization-tandem mass spectrometry (LC-ESI-MS/MS) analyses.

| Analyte                                  | Precursor ion ( <i>m/z</i> ) | Product ion ( <i>m/z</i> ) | Polarity | Cone voltage (V) | Collision energy (V) |
|------------------------------------------|------------------------------|----------------------------|----------|------------------|----------------------|
| NEM-S-NEM                                | 285.1                        | 126.1                      | +        | 35               | 20                   |
| NEM- <sup>34</sup> S-NEM-d <sub>10</sub> | 297.1                        | 131.1                      | +        | 35               | 20                   |
| BisS-AM-TME                              | 505.5                        | 136                        | +        | 35               | 40                   |
| BisS-AM-TME*                             | 509.5                        | 137                        | +        | 35               | 40                   |
| GS-AM-TME                                | 543.2                        | 414                        | +        | 35               | 20                   |
| GS-AM-TME*                               | 545.2                        | 416                        | +        | 35               | 20                   |
| GSS-AM-TME                               | 575.5                        | 446                        | +        | 40               | 20                   |
| GSS-AM-TME*                              | 577.5                        | 448                        | +        | 40               | 20                   |
| GSSG                                     | 613.1                        | 355.1                      | +        | 30               | 20                   |

NEM-S-NEM, bis-sulfur-NEM-adduct; BisS-AM-TME, TME-IAM-adduct of H<sub>2</sub>S; GS-AM-TME, TME-IAM-adduct of glutathione; GSS-AM-TME, TME-IAM-adduct of glutathione hydropersulfide. GSSG, oxidized glutathione disulfide. \*Stable isotope-labeled positions.

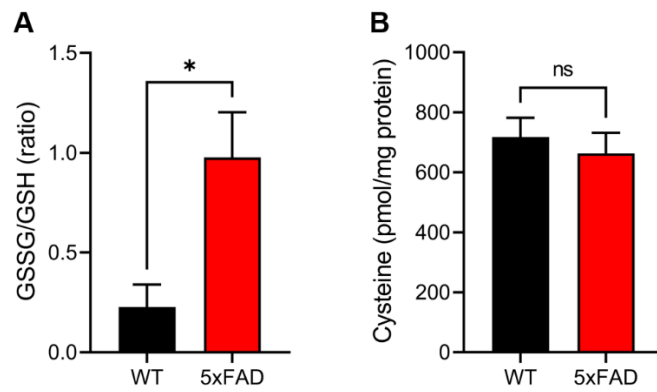

**Supplementary Figure S1. Determination of the cysteine content (A) and oxidized glutathione disulfide (GSSG):glutathione (GSH) ratio in the mouse cerebral cortex.**

Data are presented as mean  $\pm$  standard error (n = 3). \* $p$  < 0.05 versus the wild type (WT) group, compared by Student's unpaired  $t$  test. ns, not significant.
